# Supplementary material
Source: publisher figshare collection journal article supplement (https://sage.figshare.com/ndownloader/files/24159895)
Supplement: Supplementary file 1 [file 24159895]

## Sheet: ARSER
Dataset	FilePath	OutputPath
Hogenesch2009.all.data.ann.txt	~/Desktop/CyclingMethodsReview/DataAnalysis/Data/Processed/RealData/Hogenesch2009.all.data.ann.txt	~/Desktop/CyclingMethodsReview/DataAnalysis/Results/RealData/ARSER/
Hogenesch2009.sub2A.data.ann.txt	~/Desktop/CyclingMethodsReview/DataAnalysis/Data/Processed/RealData/Hogenesch2009.sub2A.data.ann.txt	~/Desktop/CyclingMethodsReview/DataAnalysis/Results/RealData/ARSER/
Hogenesch2009.sub2B.data.ann.txt	~/Desktop/CyclingMethodsReview/DataAnalysis/Data/Processed/RealData/Hogenesch2009.sub2B.data.ann.txt	~/Desktop/CyclingMethodsReview/DataAnalysis/Results/RealData/ARSER/
Hogenesch2009.sub4A.data.ann.txt	~/Desktop/CyclingMethodsReview/DataAnalysis/Data/Processed/RealData/Hogenesch2009.sub4A.data.ann.txt	~/Desktop/CyclingMethodsReview/DataAnalysis/Results/RealData/ARSER/
Hogenesch2009.sub4B.data.ann.txt	~/Desktop/CyclingMethodsReview/DataAnalysis/Data/Processed/RealData/Hogenesch2009.sub4B.data.ann.txt	~/Desktop/CyclingMethodsReview/DataAnalysis/Results/RealData/ARSER/
Hogenesch2009.sub4C.data.ann.txt	~/Desktop/CyclingMethodsReview/DataAnalysis/Data/Processed/RealData/Hogenesch2009.sub4C.data.ann.txt	~/Desktop/CyclingMethodsReview/DataAnalysis/Results/RealData/ARSER/
Hogenesch2009.sub4D.data.ann.txt	~/Desktop/CyclingMethodsReview/DataAnalysis/Data/Processed/RealData/Hogenesch2009.sub4D.data.ann.txt	~/Desktop/CyclingMethodsReview/DataAnalysis/Results/RealData/ARSER/
Hughes2012.all.data.ann.txt	~/Desktop/CyclingMethodsReview/DataAnalysis/Data/Processed/RealData/Hughes2012.all.data.ann.txt	~/Desktop/CyclingMethodsReview/DataAnalysis/Results/RealData/ARSER/
Zhang2014.all.data.ann.txt	~/Desktop/CyclingMethodsReview/DataAnalysis/Data/Processed/RealData/Zhang2014.all.data.ann.txt	~/Desktop/CyclingMethodsReview/DataAnalysis/Results/RealData/ARSER/
Hughes2012.subA.data.ann.txt	~/Desktop/CyclingMethodsReview/DataAnalysis/Data/Processed/RealData/Hughes2012.subA.data.ann.txt	~/Desktop/CyclingMethodsReview/DataAnalysis/Results/RealData/ARSER/
Hughes2012.subB.data.ann.txt	~/Desktop/CyclingMethodsReview/DataAnalysis/Data/Processed/RealData/Hughes2012.subB.data.ann.txt	~/Desktop/CyclingMethodsReview/DataAnalysis/Results/RealData/ARSER/
Zhang2014.subA.data.ann.txt	~/Desktop/CyclingMethodsReview/DataAnalysis/Data/Processed/RealData/Zhang2014.subA.data.ann.txt	~/Desktop/CyclingMethodsReview/DataAnalysis/Results/RealData/ARSER/
Zhang2014.subB.data.ann.txt	~/Desktop/CyclingMethodsReview/DataAnalysis/Data/Processed/RealData/Zhang2014.subB.data.ann.txt	~/Desktop/CyclingMethodsReview/DataAnalysis/Results/RealData/ARSER/

## Sheet: BooteJTK
DataSet	FileName	Period	Phase	Asym	Output	Rep	WaveForm
Hogenesch2009.all.data.ann.txt	~/Desktop/CyclingMethodsReview/DataAnalysis/Data/Processed/RealData/Hogenesch2009.all.data.ann.txt	~/Desktop/CyclingMethodsReview/DataAnalysis/Scripts/Methods/BooteJTK-master/ref_files/period24.txt	~/Desktop/CyclingMethodsReview/DataAnalysis/Scripts/Methods/BooteJTK-master/ref_files/phases_00-23_by1.txt	~/Desktop/CyclingMethodsReview/DataAnalysis/Scripts/Methods/BooteJTK-master/ref_files/asymmetries_00-23_by1.txt	real	2	~/Desktop/CyclingMethodsReview/DataAnalysis/Scripts/Methods/BooteJTK-master/ref_files/waveform.txt
Hogenesch2009.sub2A.data.ann.txt	~/Desktop/CyclingMethodsReview/DataAnalysis/Data/Processed/RealData/Hogenesch2009.sub2A.data.ann.txt	~/Desktop/CyclingMethodsReview/DataAnalysis/Scripts/Methods/BooteJTK-master/ref_files/period24.txt	~/Desktop/CyclingMethodsReview/DataAnalysis/Scripts/Methods/BooteJTK-master/ref_files/phases_00-22_by2.txt	~/Desktop/CyclingMethodsReview/DataAnalysis/Scripts/Methods/BooteJTK-master/ref_files/asymmetries_01-22_by2.txt	real	2	~/Desktop/CyclingMethodsReview/DataAnalysis/Scripts/Methods/BooteJTK-master/ref_files/waveform.txt
Hogenesch2009.sub2B.data.ann.txt	~/Desktop/CyclingMethodsReview/DataAnalysis/Data/Processed/RealData/Hogenesch2009.sub2B.data.ann.txt	~/Desktop/CyclingMethodsReview/DataAnalysis/Scripts/Methods/BooteJTK-master/ref_files/period24.txt	~/Desktop/CyclingMethodsReview/DataAnalysis/Scripts/Methods/BooteJTK-master/ref_files/phases_00-22_by2.txt	~/Desktop/CyclingMethodsReview/DataAnalysis/Scripts/Methods/BooteJTK-master/ref_files/asymmetries_01-22_by2.txt	real	2	~/Desktop/CyclingMethodsReview/DataAnalysis/Scripts/Methods/BooteJTK-master/ref_files/waveform.txt
Hogenesch2009.sub4A.data.ann.txt	~/Desktop/CyclingMethodsReview/DataAnalysis/Data/Processed/RealData/Hogenesch2009.sub4A.data.ann.txt	~/Desktop/CyclingMethodsReview/DataAnalysis/Scripts/Methods/BooteJTK-master/ref_files/period24.txt	~/Desktop/CyclingMethodsReview/DataAnalysis/Scripts/Methods/BooteJTK-master/ref_files/phases_00-20_by4.txt	~/Desktop/CyclingMethodsReview/DataAnalysis/Scripts/Methods/BooteJTK-master/ref_files/asymmetries_02-20_by4.txt	real	2	~/Desktop/CyclingMethodsReview/DataAnalysis/Scripts/Methods/BooteJTK-master/ref_files/waveform.txt
Hogenesch2009.sub4B.data.ann.txt	~/Desktop/CyclingMethodsReview/DataAnalysis/Data/Processed/RealData/Hogenesch2009.sub4B.data.ann.txt	~/Desktop/CyclingMethodsReview/DataAnalysis/Scripts/Methods/BooteJTK-master/ref_files/period24.txt	~/Desktop/CyclingMethodsReview/DataAnalysis/Scripts/Methods/BooteJTK-master/ref_files/phases_00-20_by4.txt	~/Desktop/CyclingMethodsReview/DataAnalysis/Scripts/Methods/BooteJTK-master/ref_files/asymmetries_02-20_by4.txt	real	2	~/Desktop/CyclingMethodsReview/DataAnalysis/Scripts/Methods/BooteJTK-master/ref_files/waveform.txt
Hogenesch2009.sub4C.data.ann.txt	~/Desktop/CyclingMethodsReview/DataAnalysis/Data/Processed/RealData/Hogenesch2009.sub4C.data.ann.txt	~/Desktop/CyclingMethodsReview/DataAnalysis/Scripts/Methods/BooteJTK-master/ref_files/period24.txt	~/Desktop/CyclingMethodsReview/DataAnalysis/Scripts/Methods/BooteJTK-master/ref_files/phases_00-20_by4.txt	~/Desktop/CyclingMethodsReview/DataAnalysis/Scripts/Methods/BooteJTK-master/ref_files/asymmetries_02-20_by4.txt	real	2	~/Desktop/CyclingMethodsReview/DataAnalysis/Scripts/Methods/BooteJTK-master/ref_files/waveform.txt
Hogenesch2009.sub4D.data.ann.txt	~/Desktop/CyclingMethodsReview/DataAnalysis/Data/Processed/RealData/Hogenesch2009.sub4D.data.ann.txt	~/Desktop/CyclingMethodsReview/DataAnalysis/Scripts/Methods/BooteJTK-master/ref_files/period24.txt	~/Desktop/CyclingMethodsReview/DataAnalysis/Scripts/Methods/BooteJTK-master/ref_files/phases_00-20_by4.txt	~/Desktop/CyclingMethodsReview/DataAnalysis/Scripts/Methods/BooteJTK-master/ref_files/asymmetries_02-20_by4.txt	real	2	~/Desktop/CyclingMethodsReview/DataAnalysis/Scripts/Methods/BooteJTK-master/ref_files/waveform.txt
Hughes2012.all.data.ann.txt	~/Desktop/CyclingMethodsReview/DataAnalysis/Data/Processed/RealData/Hughes2012.all.data.ann.txt	~/Desktop/CyclingMethodsReview/DataAnalysis/Scripts/Methods/BooteJTK-master/ref_files/period24.txt	~/Desktop/CyclingMethodsReview/DataAnalysis/Scripts/Methods/BooteJTK-master/ref_files/phases_00-22_by2.txt	~/Desktop/CyclingMethodsReview/DataAnalysis/Scripts/Methods/BooteJTK-master/ref_files/asymmetries_01-22_by2.txt	real	2	~/Desktop/CyclingMethodsReview/DataAnalysis/Scripts/Methods/BooteJTK-master/ref_files/waveform.txt
Zhang2014.all.data.ann.txt	~/Desktop/CyclingMethodsReview/DataAnalysis/Data/Processed/RealData/Zhang2014.all.data.ann.txt	~/Desktop/CyclingMethodsReview/DataAnalysis/Scripts/Methods/BooteJTK-master/ref_files/period24.txt	~/Desktop/CyclingMethodsReview/DataAnalysis/Scripts/Methods/BooteJTK-master/ref_files/phases_00-22_by2.txt	~/Desktop/CyclingMethodsReview/DataAnalysis/Scripts/Methods/BooteJTK-master/ref_files/asymmetries_01-22_by2.txt	real	2	~/Desktop/CyclingMethodsReview/DataAnalysis/Scripts/Methods/BooteJTK-master/ref_files/waveform.txt
Hughes2012.subA.data.ann.txt	~/Desktop/CyclingMethodsReview/DataAnalysis/Data/Processed/RealData/Hughes2012.subA.data.ann.txt	~/Desktop/CyclingMethodsReview/DataAnalysis/Scripts/Methods/BooteJTK-master/ref_files/period24.txt	~/Desktop/CyclingMethodsReview/DataAnalysis/Scripts/Methods/BooteJTK-master/ref_files/phases_00-20_by4.txt	~/Desktop/CyclingMethodsReview/DataAnalysis/Scripts/Methods/BooteJTK-master/ref_files/asymmetries_02-20_by4.txt	real	2	~/Desktop/CyclingMethodsReview/DataAnalysis/Scripts/Methods/BooteJTK-master/ref_files/waveform.txt
Hughes2012.subB.data.ann.txt	~/Desktop/CyclingMethodsReview/DataAnalysis/Data/Processed/RealData/Hughes2012.subB.data.ann.txt	~/Desktop/CyclingMethodsReview/DataAnalysis/Scripts/Methods/BooteJTK-master/ref_files/period24.txt	~/Desktop/CyclingMethodsReview/DataAnalysis/Scripts/Methods/BooteJTK-master/ref_files/phases_00-20_by4.txt	~/Desktop/CyclingMethodsReview/DataAnalysis/Scripts/Methods/BooteJTK-master/ref_files/asymmetries_02-20_by4.txt	real	2	~/Desktop/CyclingMethodsReview/DataAnalysis/Scripts/Methods/BooteJTK-master/ref_files/waveform.txt
Zhang2014.subA.data.ann.txt	~/Desktop/CyclingMethodsReview/DataAnalysis/Data/Processed/RealData/Zhang2014.subA.data.ann.txt	~/Desktop/CyclingMethodsReview/DataAnalysis/Scripts/Methods/BooteJTK-master/ref_files/period24.txt	~/Desktop/CyclingMethodsReview/DataAnalysis/Scripts/Methods/BooteJTK-master/ref_files/phases_00-20_by4.txt	~/Desktop/CyclingMethodsReview/DataAnalysis/Scripts/Methods/BooteJTK-master/ref_files/asymmetries_02-20_by4.txt	real	2	~/Desktop/CyclingMethodsReview/DataAnalysis/Scripts/Methods/BooteJTK-master/ref_files/waveform.txt
Zhang2014.subB.data.ann.txt	~/Desktop/CyclingMethodsReview/DataAnalysis/Data/Processed/RealData/Zhang2014.subB.data.ann.txt	~/Desktop/CyclingMethodsReview/DataAnalysis/Scripts/Methods/BooteJTK-master/ref_files/period24.txt	~/Desktop/CyclingMethodsReview/DataAnalysis/Scripts/Methods/BooteJTK-master/ref_files/phases_00-20_by4.txt	~/Desktop/CyclingMethodsReview/DataAnalysis/Scripts/Methods/BooteJTK-master/ref_files/asymmetries_02-20_by4.txt	real	2	~/Desktop/CyclingMethodsReview/DataAnalysis/Scripts/Methods/BooteJTK-master/ref_files/waveform.txt

## Sheet: JTK_Cycle
Dataset	input	output	timepoints	reps	start	end	interval	length
Hogenesch2009.all.data.ann.txt	~/Desktop/CyclingMethodsReview/DataAnalysis/Data/Processed/RealData/Hogenesch2009.all.data.ann.txt	~/Desktop/CyclingMethodsReview/DataAnalysis/Results/RealData/JTK/	48	1	23	25	1	48
Hogenesch2009.sub2A.data.ann.txt	~/Desktop/CyclingMethodsReview/DataAnalysis/Data/Processed/RealData/Hogenesch2009.sub2A.data.ann.txt	~/Desktop/CyclingMethodsReview/DataAnalysis/Results/RealData/JTK/	24	1	11	13	2	48
Hogenesch2009.sub2B.data.ann.txt	~/Desktop/CyclingMethodsReview/DataAnalysis/Data/Processed/RealData/Hogenesch2009.sub2B.data.ann.txt	~/Desktop/CyclingMethodsReview/DataAnalysis/Results/RealData/JTK/	24	1	11	13	2	48
Hogenesch2009.sub4A.data.ann.txt	~/Desktop/CyclingMethodsReview/DataAnalysis/Data/Processed/RealData/Hogenesch2009.sub4A.data.ann.txt	~/Desktop/CyclingMethodsReview/DataAnalysis/Results/RealData/JTK/	12	1	6	7	4	48
Hogenesch2009.sub4B.data.ann.txt	~/Desktop/CyclingMethodsReview/DataAnalysis/Data/Processed/RealData/Hogenesch2009.sub4B.data.ann.txt	~/Desktop/CyclingMethodsReview/DataAnalysis/Results/RealData/JTK/	12	1	6	7	4	48
Hogenesch2009.sub4C.data.ann.txt	~/Desktop/CyclingMethodsReview/DataAnalysis/Data/Processed/RealData/Hogenesch2009.sub4C.data.ann.txt	~/Desktop/CyclingMethodsReview/DataAnalysis/Results/RealData/JTK/	12	1	6	7	4	48
Hogenesch2009.sub4D.data.ann.txt	~/Desktop/CyclingMethodsReview/DataAnalysis/Data/Processed/RealData/Hogenesch2009.sub4D.data.ann.txt	~/Desktop/CyclingMethodsReview/DataAnalysis/Results/RealData/JTK/	12	1	6	7	4	48
Hughes2012.all.data.ann.txt	~/Desktop/CyclingMethodsReview/DataAnalysis/Data/Processed/RealData/Hughes2012.all.data.ann.txt	~/Desktop/CyclingMethodsReview/DataAnalysis/Results/RealData/JTK/	24	1	11	13	2	48
Zhang2014.all.data.ann.txt	~/Desktop/CyclingMethodsReview/DataAnalysis/Data/Processed/RealData/Zhang2014.all.data.ann.txt	~/Desktop/CyclingMethodsReview/DataAnalysis/Results/RealData/JTK/	24	1	11	13	2	48
Hughes2012.subA.data.ann.txt	~/Desktop/CyclingMethodsReview/DataAnalysis/Data/Processed/RealData/Hughes2012.subA.data.ann.txt	~/Desktop/CyclingMethodsReview/DataAnalysis/Results/RealData/JTK/	12	1	6	7	4	48
Hughes2012.subB.data.ann.txt	~/Desktop/CyclingMethodsReview/DataAnalysis/Data/Processed/RealData/Hughes2012.subB.data.ann.txt	~/Desktop/CyclingMethodsReview/DataAnalysis/Results/RealData/JTK/	12	1	6	7	4	48
Zhang2014.subA.data.ann.txt	~/Desktop/CyclingMethodsReview/DataAnalysis/Data/Processed/RealData/Zhang2014.subA.data.ann.txt	~/Desktop/CyclingMethodsReview/DataAnalysis/Results/RealData/JTK/	12	1	6	7	4	48
Zhang2014.subB.data.ann.txt	~/Desktop/CyclingMethodsReview/DataAnalysis/Data/Processed/RealData/Zhang2014.subB.data.ann.txt	~/Desktop/CyclingMethodsReview/DataAnalysis/Results/RealData/JTK/	12	1	6	7	4	48

## Sheet: RAIN
Dataset	input	output	interval	period	peakBorderStart	peakBorderEnd
Hogenesch2009.all.data.ann.txt	~/Desktop/CyclingMethodsReview/DataAnalysis/Data/Processed/RealData/Hogenesch2009.all.data.ann.txt	~/Desktop/CyclingMethodsReview/DataAnalysis/Results/RealData/RAIN/	1	24	0.1	0.9
Hogenesch2009.sub2A.data.ann.txt	~/Desktop/CyclingMethodsReview/DataAnalysis/Data/Processed/RealData/Hogenesch2009.sub2A.data.ann.txt	~/Desktop/CyclingMethodsReview/DataAnalysis/Results/RealData/RAIN/	2	24	0.2	0.8
Hogenesch2009.sub2B.data.ann.txt	~/Desktop/CyclingMethodsReview/DataAnalysis/Data/Processed/RealData/Hogenesch2009.sub2B.data.ann.txt	~/Desktop/CyclingMethodsReview/DataAnalysis/Results/RealData/RAIN/	2	24	0.2	0.8
Hogenesch2009.sub4A.data.ann.txt	~/Desktop/CyclingMethodsReview/DataAnalysis/Data/Processed/RealData/Hogenesch2009.sub4A.data.ann.txt	~/Desktop/CyclingMethodsReview/DataAnalysis/Results/RealData/RAIN/	4	24	0.3	0.7
Hogenesch2009.sub4B.data.ann.txt	~/Desktop/CyclingMethodsReview/DataAnalysis/Data/Processed/RealData/Hogenesch2009.sub4B.data.ann.txt	~/Desktop/CyclingMethodsReview/DataAnalysis/Results/RealData/RAIN/	4	24	0.3	0.7
Hogenesch2009.sub4C.data.ann.txt	~/Desktop/CyclingMethodsReview/DataAnalysis/Data/Processed/RealData/Hogenesch2009.sub4C.data.ann.txt	~/Desktop/CyclingMethodsReview/DataAnalysis/Results/RealData/RAIN/	4	24	0.3	0.7
Hogenesch2009.sub4D.data.ann.txt	~/Desktop/CyclingMethodsReview/DataAnalysis/Data/Processed/RealData/Hogenesch2009.sub4D.data.ann.txt	~/Desktop/CyclingMethodsReview/DataAnalysis/Results/RealData/RAIN/	4	24	0.3	0.7
Hughes2012.all.data.ann.txt	~/Desktop/CyclingMethodsReview/DataAnalysis/Data/Processed/RealData/Hughes2012.all.data.ann.txt	~/Desktop/CyclingMethodsReview/DataAnalysis/Results/RealData/RAIN/	2	24	0.2	0.8
Zhang2014.all.data.ann.txt	~/Desktop/CyclingMethodsReview/DataAnalysis/Data/Processed/RealData/Zhang2014.all.data.ann.txt	~/Desktop/CyclingMethodsReview/DataAnalysis/Results/RealData/RAIN/	2	24	0.2	0.8
Hughes2012.subA.data.ann.txt	~/Desktop/CyclingMethodsReview/DataAnalysis/Data/Processed/RealData/Hughes2012.subA.data.ann.txt	~/Desktop/CyclingMethodsReview/DataAnalysis/Results/RealData/RAIN/	4	24	0.3	0.7
Hughes2012.subB.data.ann.txt	~/Desktop/CyclingMethodsReview/DataAnalysis/Data/Processed/RealData/Hughes2012.subB.data.ann.txt	~/Desktop/CyclingMethodsReview/DataAnalysis/Results/RealData/RAIN/	4	24	0.3	0.7
Zhang2014.subA.data.ann.txt	~/Desktop/CyclingMethodsReview/DataAnalysis/Data/Processed/RealData/Zhang2014.subA.data.ann.txt	~/Desktop/CyclingMethodsReview/DataAnalysis/Results/RealData/RAIN/	4	24	0.3	0.7
Zhang2014.subB.data.ann.txt	~/Desktop/CyclingMethodsReview/DataAnalysis/Data/Processed/RealData/Zhang2014.subB.data.ann.txt	~/Desktop/CyclingMethodsReview/DataAnalysis/Results/RealData/RAIN/	4	24	0.3	0.7
